# Supplementary material for: A Spiral in the Heart: Mitral Valve Endocarditis with Unusual Vegetation Shape Potentially Affecting Effectiveness of Antibiotic Therapy
Source: Case Rep Cardiol. 2015 Oct 25;2015:483067. doi: 10.1155/2015/483067 (PMC4637073; doi:10.1155/2015/483067)
Supplement: Supplementary file 1 — Movie 1: Transthoracic ecochardiography . Apical four chambers view showing a mass attached to a prolapsing posterior mitral leaflet. Movie 2: Transesophageal echocardiography. Mid-esophageal view showing a spiral-like endocarditic vegetation. Movie 3: Transesophageal echocardiography. Color Doppler imaging showing high turbulence within the vegetation. Movie 4: Transesophageal echocardiography. Color Doppler imaging showing severe mitral regurgitation. [file 483067.f1.zip]

Archive with 5 entries (4 files):
- 483067.f1/
- 483067.f1/Movie 1.avi
- 483067.f1/Movie 2.avi
- 483067.f1/Movie 3.avi
- 483067.f1/Movie 4.avi
